# Supplementary material for: The Homoleptic Curcumin-Copper Single Crystal (ML2): A Long Awaited Cherry on the Cake in the Field of Curcumin Metal Complexes
Source: Preprints.org preprint supplement (doi:10.20944/preprints202306.2148.v1), 2023-06-29
Supplement: Supplementary file 1 [file supplementary]

# *Supporting information*

## **The Homoleptic Curcumin-Copper Single Crystal (ML<sub>2</sub>): A long awaited cherry on the cake in the field of curcumin metal complexes.**

Antonino Arenaza-Corona,<sup>a§</sup> Marco Antonio Obregón-Mendoza,<sup>a§</sup> William Meza-Morales,<sup>b</sup>  
María Teresa Ramírez-Apan,<sup>a</sup> Antonio Nieto-Camacho,<sup>a</sup> Rubén A. Toscano,<sup>a</sup> Ruben  
Sánchez-Obregón,<sup>a</sup> and Raúl G. Enríquez<sup>a\*</sup>

<sup>a</sup>Instituto de Química, Universidad Nacional Autónoma de México, Circuito Exterior,  
Ciudad Universitaria, México City, C.P. 07340, México.

<sup>b</sup>Department of Chemical Engineering, University of Puerto Rico-Mayaguez, Route 108,  
Mayaguez, Puerto Rico, USA.

**Corresponding author:** \*[enriquezhabib@gmail.com](mailto:enriquezhabib@gmail.com)

<sup>§</sup> "These authors contributed equally to this work"

## TABLE OF CONTENTS

|                                                  |           |
|--------------------------------------------------|-----------|
| <b>1. Single crystal X-ray diffraction .....</b> | <b>3</b>  |
| <b>2. Electrospray ionization .....</b>          | <b>8</b>  |
| <b>3. EPR .....</b>                              | <b>11</b> |
| <b>4. IR (ATR).....</b>                          | <b>12</b> |
| <b>5. UV-Vis .....</b>                           | <b>13</b> |
| <b>6. Fingerprints plots .....</b>               | <b>14</b> |
| <b>7. Cytotoxicity .....</b>                     | <b>15</b> |
| <b>8. Antioxidant.....</b>                       | <b>15</b> |

### 1. Single crystal X-ray diffraction

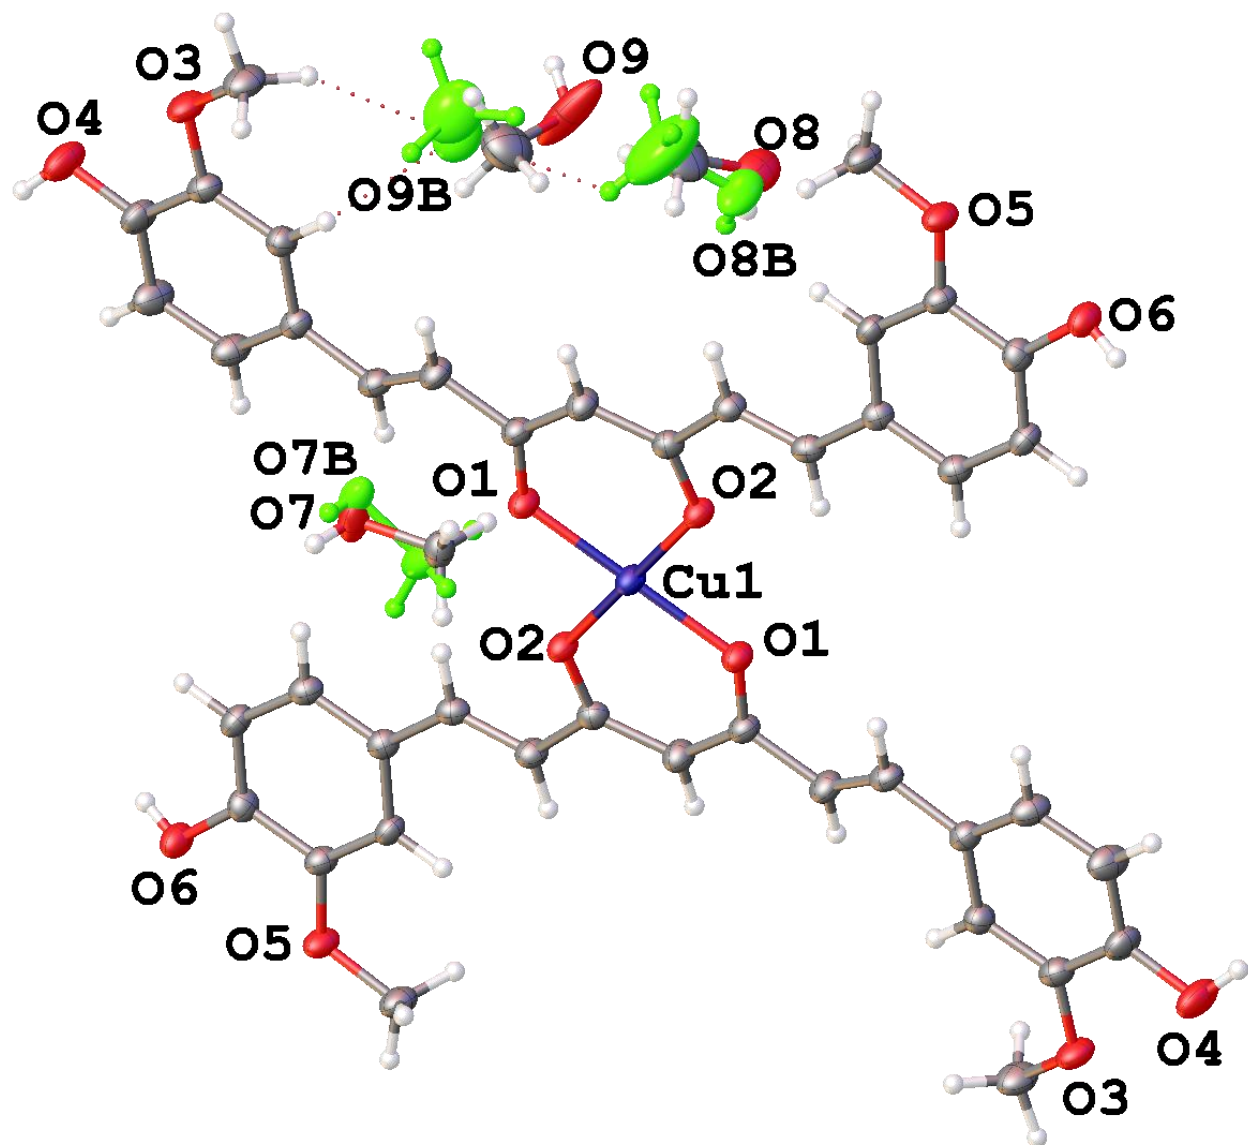

**Figure S1.** The molecular structure of complex 1 including molecules of solvent (methanol) and the disordered position of methanol (green ellipsoids).

```
R(reflections)= 0.0498( 4638)
S = 1.050
Npar= 373
wR2(reflections)=
0.1293( 5848)
```

---

The following ALERTS were generated. Each ALERT has the format

**test-name ALERT\_alert-type\_alert-level.**

Click on the hyperlinks for more details of the test.

---

### Alert level B

PLAT910\_ALERT\_3\_B Missing # of FCF Reflection(s) Below Theta(Min). 11 Note

---

### Alert level C

PLAT911\_ALERT\_3\_C Missing FCF Refl Between Thmin & STh/L= 0.600 2 Report  
PLAT977\_ALERT\_2\_C Check Negative Difference Density on H23C . -0.37 eA-3

---

### Alert level G

PLAT002\_ALERT\_2\_G Number of Distance or Angle Restraints on AtSite 12 Note  
PLAT003\_ALERT\_2\_G Number of Uiso or Uij Restrained non-H Atoms ... 12 Report  
PLAT007\_ALERT\_5\_G Number of Unrefined Donor-H Atoms ..... 5 Report  
PLAT175\_ALERT\_4\_G The CIF-Embedded .res File Contains SAME Records 1 Report  
PLAT177\_ALERT\_4\_G The CIF-Embedded .res File Contains DELU Records 2 Report  
PLAT178\_ALERT\_4\_G The CIF-Embedded .res File Contains SIMU Records 2 Report  
PLAT188\_ALERT\_3\_G A Non-default SIMU Restraint Value has been used 0.0100 Report  
PLAT188\_ALERT\_3\_G A Non-default SIMU Restraint Value has been used 0.0100 Report  
PLAT189\_ALERT\_3\_G A Non-default SAME Restraint Value for First Par 0.0100 Report  
PLAT189\_ALERT\_3\_G A Non-default SAME Restraint Value for SecondPar 0.0100 Report  
PLAT192\_ALERT\_3\_G A Non-default DELU Restraint Value for First Par 0.0050 Report  
PLAT192\_ALERT\_3\_G A Non-default DELU Restraint Value for First Par 0.0050 Report  
PLAT300\_ALERT\_4\_G Atom Site Occupancy of O9 Constrained at 0.25 Check  
PLAT300\_ALERT\_4\_G Atom Site Occupancy of C24 Constrained at 0.25 Check  
PLAT300\_ALERT\_4\_G Atom Site Occupancy of H9A Constrained at 0.25 Check  
PLAT300\_ALERT\_4\_G Atom Site Occupancy of H24A Constrained at 0.25 Check  
PLAT300\_ALERT\_4\_G Atom Site Occupancy of H24B Constrained at 0.25 Check  
PLAT300\_ALERT\_4\_G Atom Site Occupancy of H24C Constrained at 0.25 Check  
PLAT300\_ALERT\_4\_G Atom Site Occupancy of O9B Constrained at 0.25 Check  
PLAT300\_ALERT\_4\_G Atom Site Occupancy of C24B Constrained at 0.25 Check  
PLAT300\_ALERT\_4\_G Atom Site Occupancy of H9B Constrained at 0.25 Check  
PLAT300\_ALERT\_4\_G Atom Site Occupancy of H24D Constrained at 0.25 Check  
PLAT300\_ALERT\_4\_G Atom Site Occupancy of H24E Constrained at 0.25 Check  
PLAT300\_ALERT\_4\_G Atom Site Occupancy of H24F Constrained at 0.25 Check  
PLAT302\_ALERT\_4\_G Anion/Solvent/Minor-Residue Disorder (Resd 2 ) 100% Note  
PLAT302\_ALERT\_4\_G Anion/Solvent/Minor-Residue Disorder (Resd 3 ) 100% Note  
PLAT302\_ALERT\_4\_G Anion/Solvent/Minor-Residue Disorder (Resd 4 ) 100% Note  
PLAT302\_ALERT\_4\_G Anion/Solvent/Minor-Residue Disorder (Resd 5 ) 100% Note  
PLAT302\_ALERT\_4\_G Anion/Solvent/Minor-Residue Disorder (Resd 6 ) 100% Note  
PLAT302\_ALERT\_4\_G Anion/Solvent/Minor-Residue Disorder (Resd 7 ) 100% Note  
PLAT304\_ALERT\_4\_G Non-Integer Number of Atoms in ..... (Resd 2 ) 3.11 Check  
PLAT304\_ALERT\_4\_G Non-Integer Number of Atoms in ..... (Resd 3 ) 3.11 Check  
PLAT304\_ALERT\_4\_G Non-Integer Number of Atoms in ..... (Resd 4 ) 2.89 Check  
PLAT304\_ALERT\_4\_G Non-Integer Number of Atoms in ..... (Resd 5 ) 2.89 Check  
PLAT304\_ALERT\_4\_G Non-Integer Number of Atoms in ..... (Resd 6 ) 1.50 Check  
PLAT304\_ALERT\_4\_G Non-Integer Number of Atoms in ..... (Resd 7 ) 1.50 Check  
PLAT417\_ALERT\_2\_G Short Inter D-H..H-D H4A ..H9A . 2.10 Ang.  
1-x,2-y,-z = 2\_675 Check  
PLAT417\_ALERT\_2\_G Short Inter D-H..H-D H6A ..H7B . 2.08 Ang.  
-1+x,-1+y,z = 1\_445 Check

|                   |                                                  |       |   |      |              |
|-------------------|--------------------------------------------------|-------|---|------|--------------|
| PLAT480_ALERT_4_G | Long H...A H-Bond Reported H21A                  | ..04  | . | 2.64 | Ang.         |
| PLAT480_ALERT_4_G | Long H...A H-Bond Reported H24F                  | ..04  | . | 2.62 | Ang.         |
| PLAT789_ALERT_4_G | Atoms with Negative _atom_site_disorder_group #  |       |   | 6    | Check        |
| PLAT822_ALERT_4_G | CIF-embedded .res Contains Negative PART Numbers |       |   | 1    | Check        |
| PLAT860_ALERT_3_G | Number of Least-Squares Restraints .....         |       |   | 120  | Note         |
| PLAT912_ALERT_4_G | Missing # of FCF Reflections Above STh/L=        | 0.600 |   | 616  | Note         |
| PLAT933_ALERT_2_G | Number of HKL-OMIT Records in Embedded .res File |       |   | 2    | Note         |
| PLAT941_ALERT_3_G | Average HKL Measurement Multiplicity .....       |       |   | 4.4  | Low          |
| PLAT965_ALERT_2_G | The SHELXL WEIGHT Optimisation has not Converged |       |   |      | Please Check |
| PLAT978_ALERT_2_G | Number C-C Bonds with Positive Residual Density. |       |   | 8    | Info         |

---

0 **ALERT level A** = Most likely a serious problem - resolve or explain  
 1 **ALERT level B** = A potentially serious problem, consider carefully  
 2 **ALERT level C** = Check. Ensure it is not caused by an omission or oversight  
 48 **ALERT level G** = General information/check it is not something unexpected

0 ALERT type 1 CIF construction/syntax error, inconsistent or missing data  
 8 ALERT type 2 Indicator that the structure model may be wrong or deficient  
 10 ALERT type 3 Indicator that the structure quality may be low  
 32 ALERT type 4 Improvement, methodology, query or suggestion  
 1 ALERT type 5 Informative message, check

---

It is advisable to attempt to resolve as many as possible of the alerts in all categories. Often the minor alerts point to easily fixed oversights, errors and omissions in your CIF or refinement strategy, so attention to these fine details can be worthwhile. In order to resolve some of the more serious problems it may be necessary to carry out additional measurements or structure refinements. However, the purpose of your study may justify the reported deviations and the more serious of these should normally be commented upon in the discussion or experimental section of a paper or in the "special\_details" fields of the CIF. checkCIF was carefully designed to identify outliers and unusual parameters, but every test has its limitations and alerts that are not important in a particular case may appear. Conversely, the absence of alerts does not guarantee there are no aspects of the results needing attention. It is up to the individual to critically assess their own results and, if necessary, seek expert advice.

### Publication of your CIF in IUCr journals

A basic structural check has been run on your CIF. These basic checks will be run on all CIFs submitted for publication in IUCr journals (*Acta Crystallographica*, *Journal of Applied Crystallography*, *Journal of Synchrotron Radiation*); however, if you intend to submit to *Acta Crystallographica Section C* or *E* or *IUCrData*, you should make sure that full publication checks are run on the final version of your CIF prior to submission.

### Publication of your CIF in other journals

Please refer to the *Notes for Authors* of the relevant journal for any special instructions relating to CIF submission.

PLATON version of 10/05/2023; check.def file version of 10/05/2023

Datablock Compound\_1 - ellipsoid plot

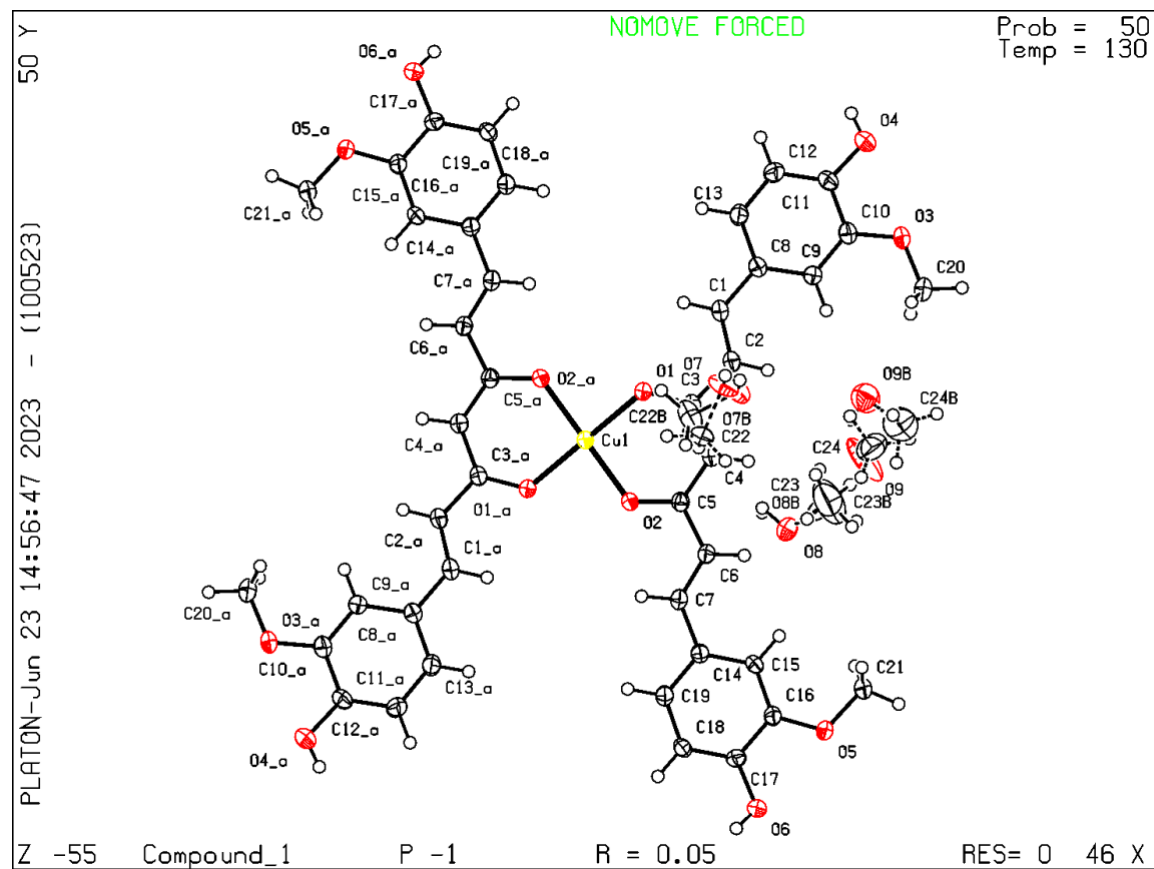

## 2. Electrospray ionization

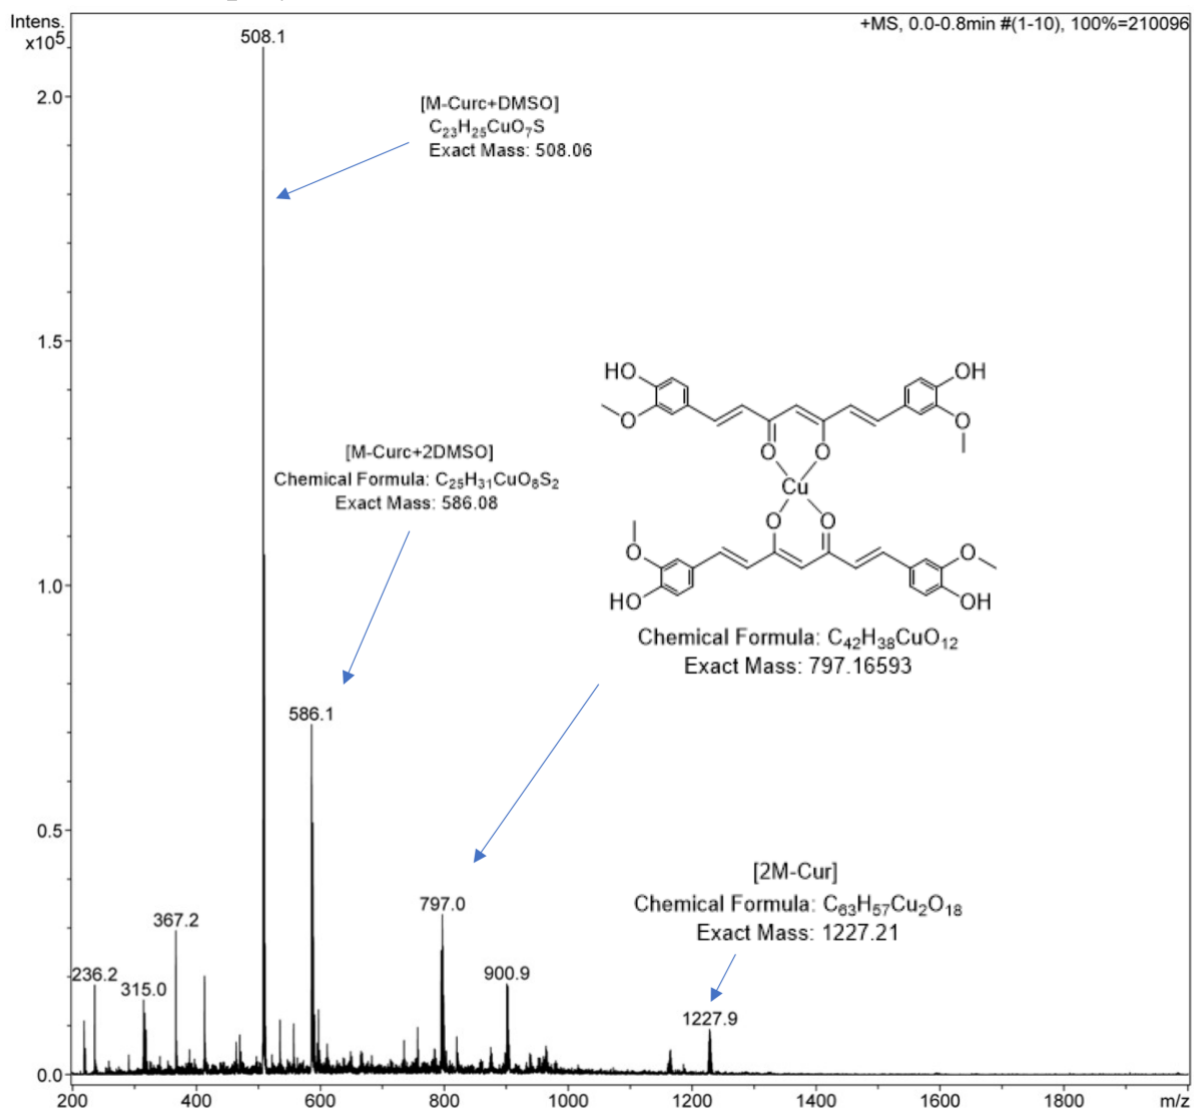

**Figure S2.** Mass spectrum of complex 1 (dark brown solid) by ESI<sup>+</sup> previously dissolved in DMSO.



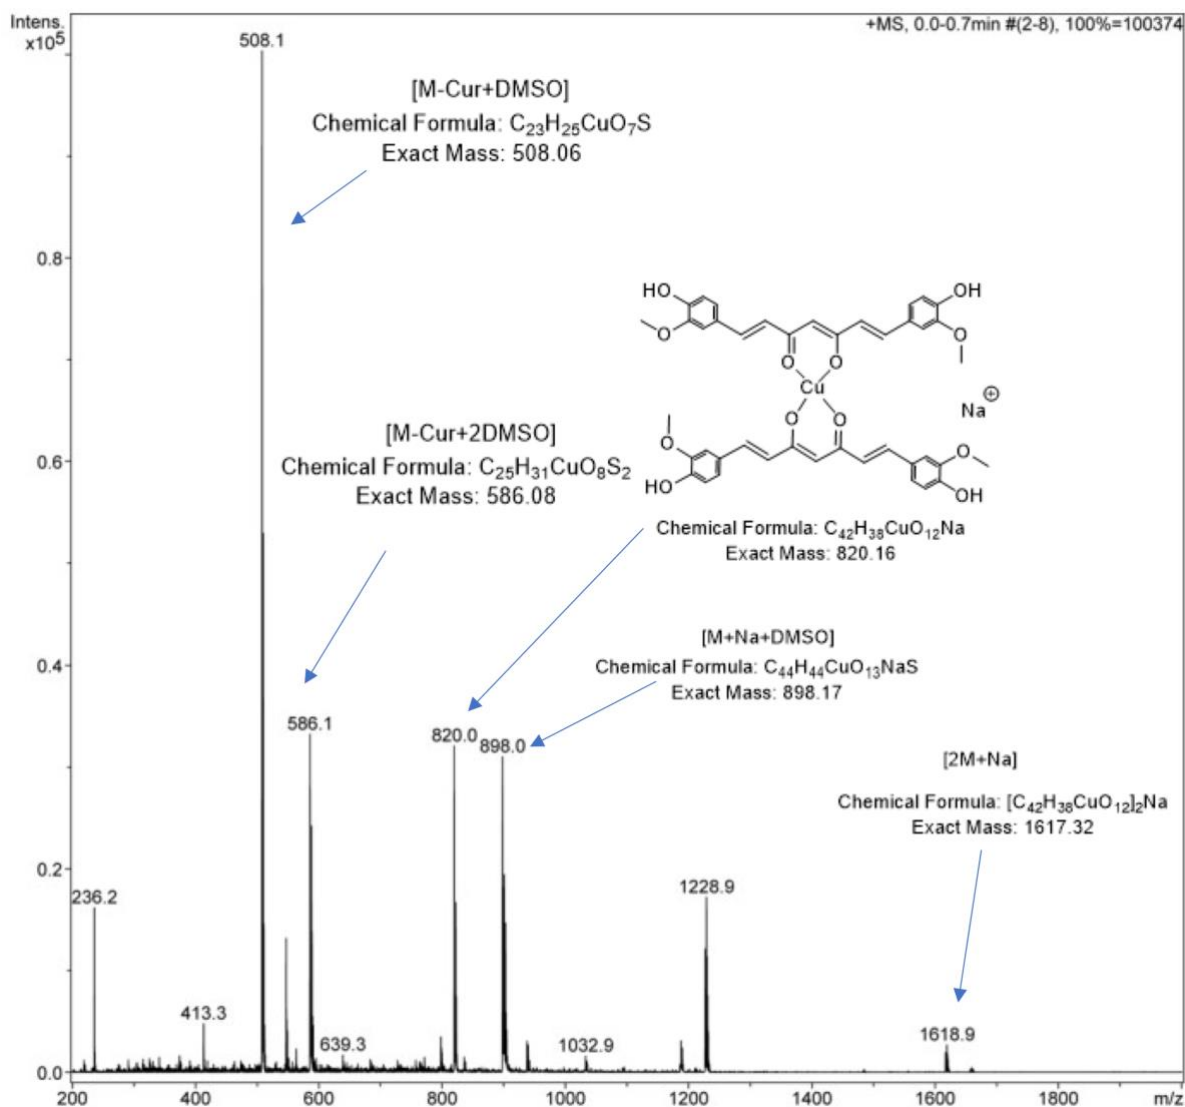

**Figure S3.** Mass spectrum of complex **1** (brilliant brown solid) by ESI<sup>+</sup> previously dissolved in DMSO.

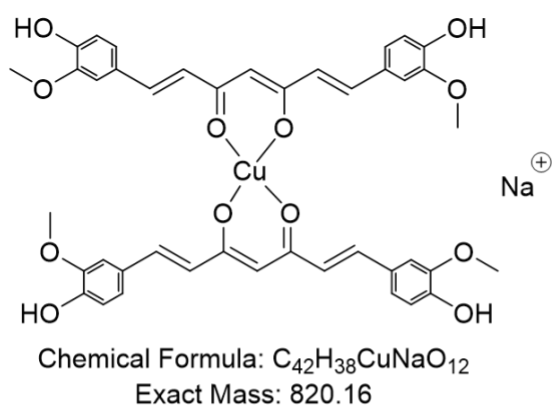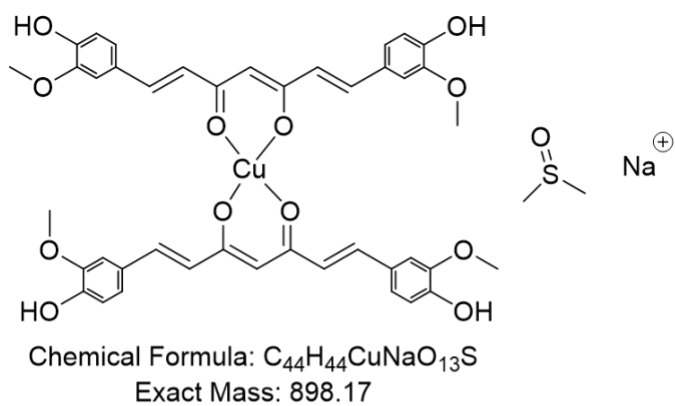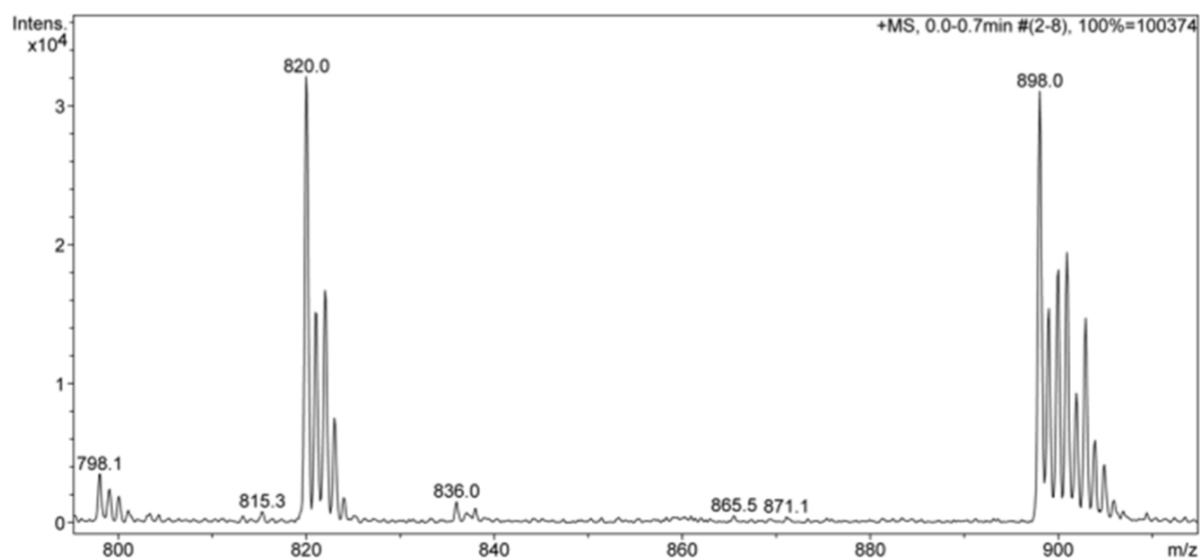

**Figure S4.** Ampliated Mass spectrum of complex 1 (brilliant brown solid) by ESI<sup>+</sup> previously dissolved in DMSO.

### 3. EPR

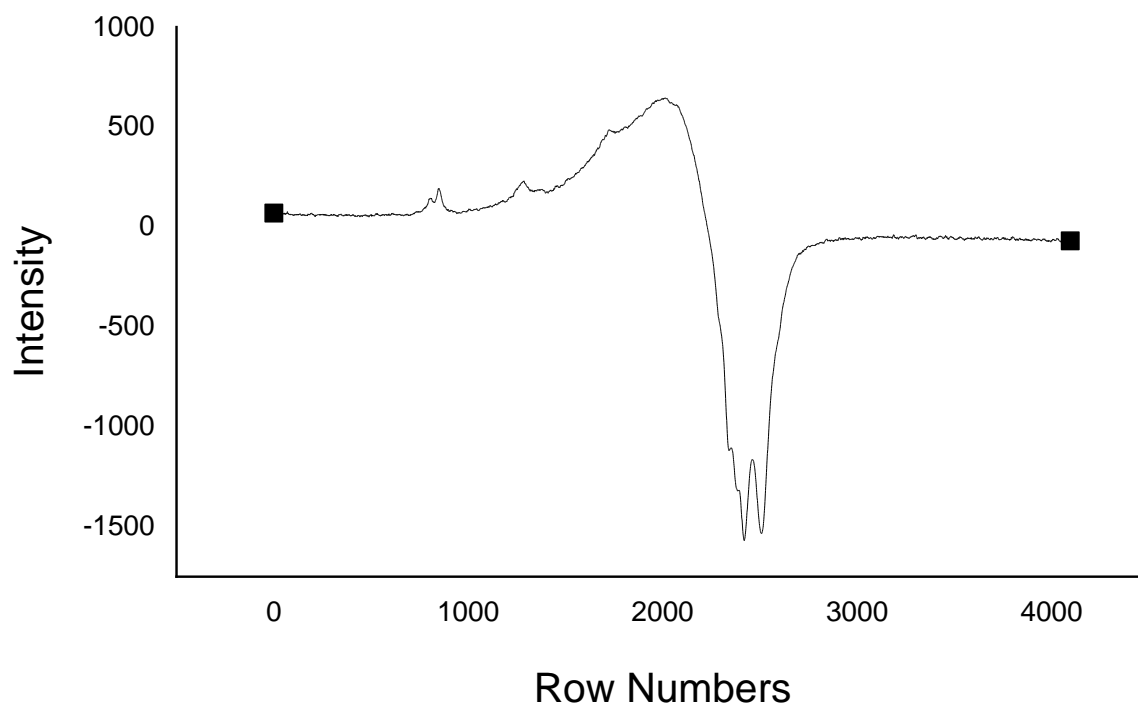

**Figure S5.** Paramagnetic Electron Resonance of the complex (**1**) at solid-state (dark brown solid).

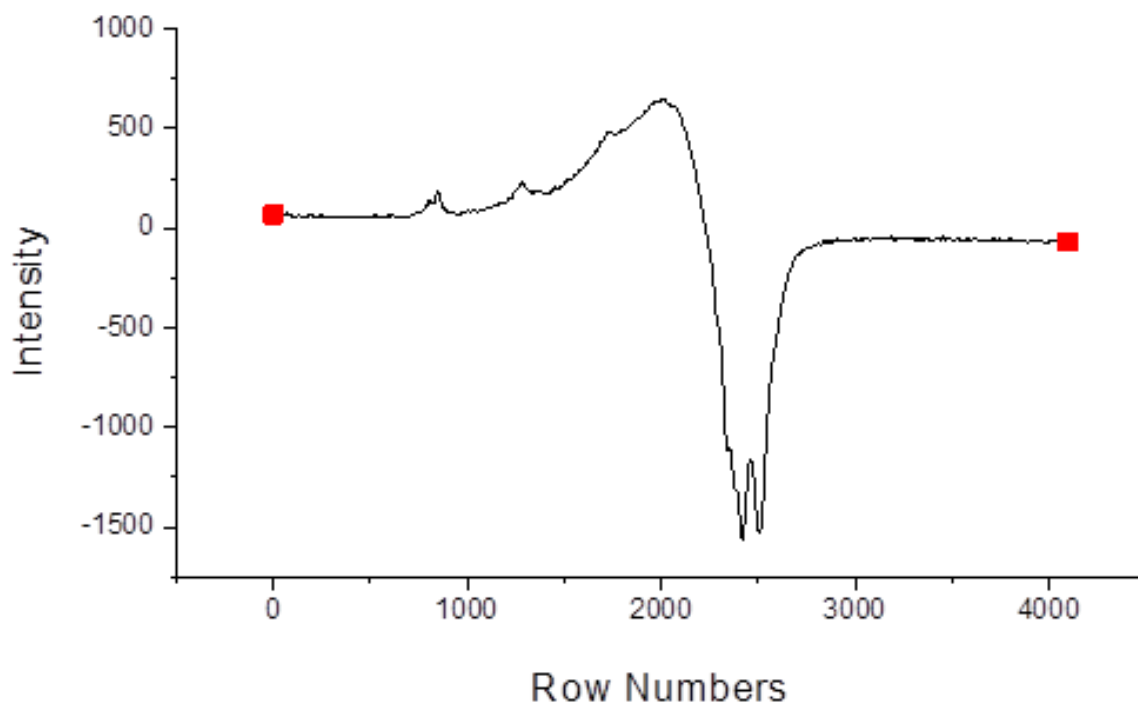

**Figure S6.** Paramagnetic Electron Resonance of the complex (**1**) compound at 77 K in DMSO of brilliant brown crystalline (mother liquor).

#### 4. IR (ATR)

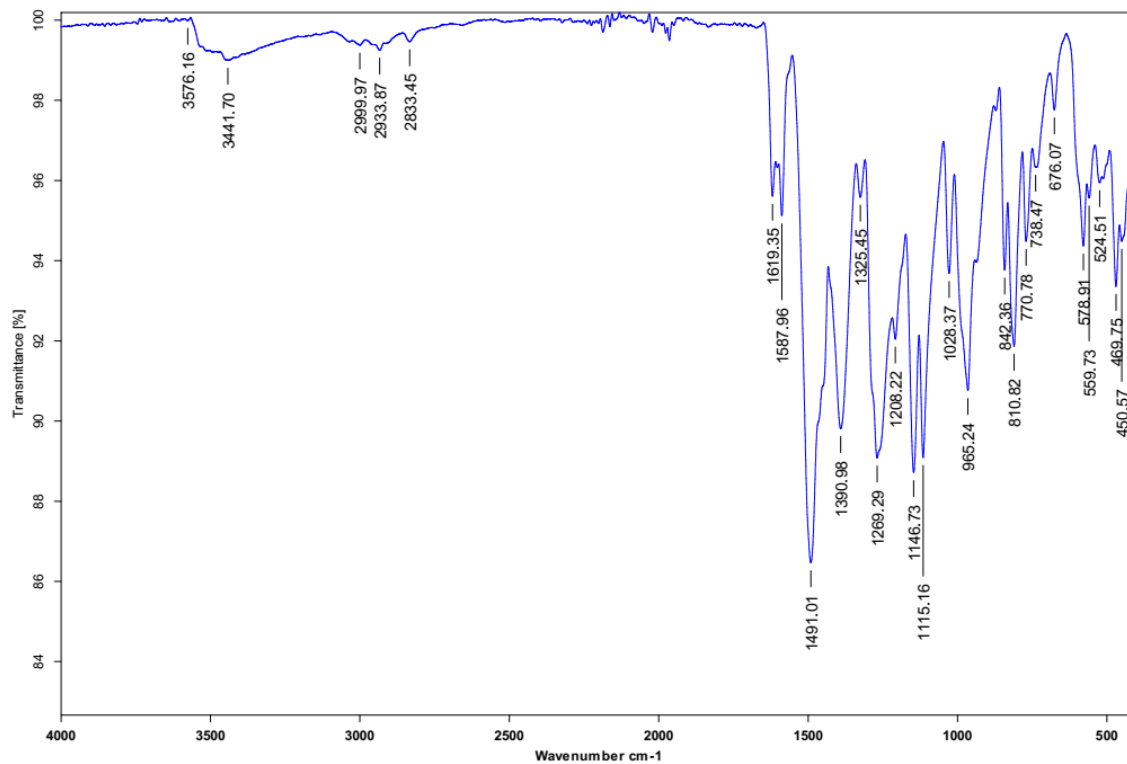

Figure S6. IR-ATR spectra of complex (1) dark brown solid.

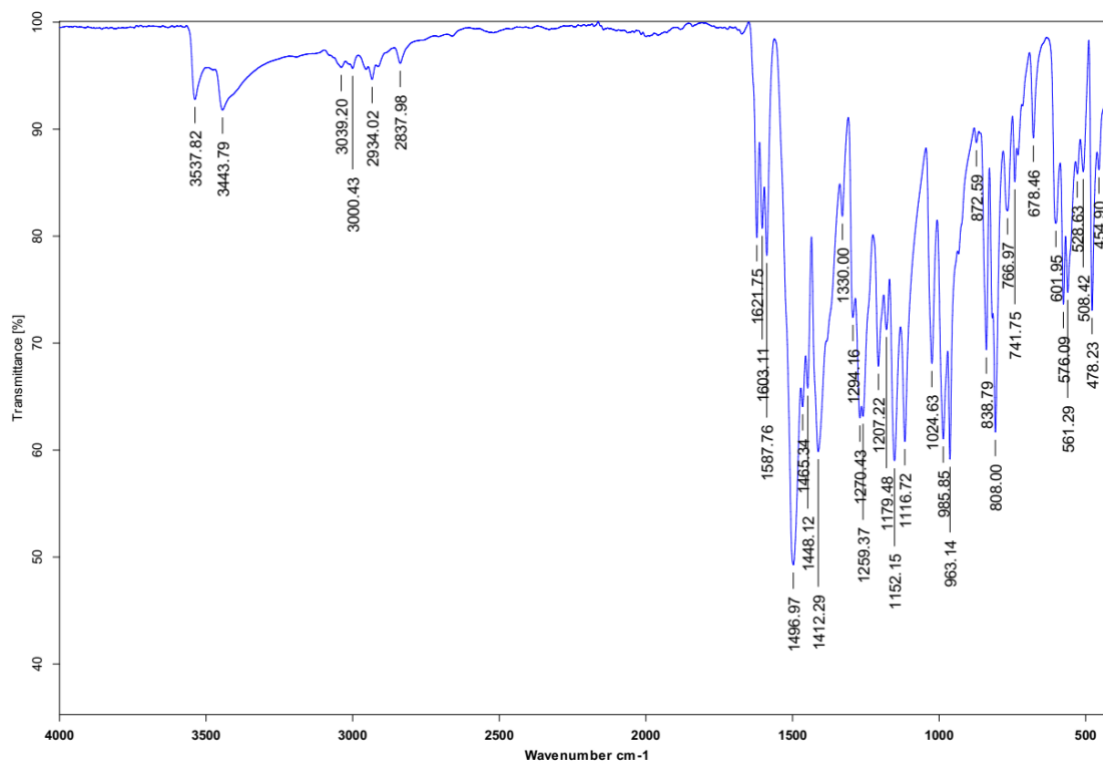

Figure S7. IR-ATR spectra of complex (1) brilliant brown crystalline solid.

## 5. UV-Vis

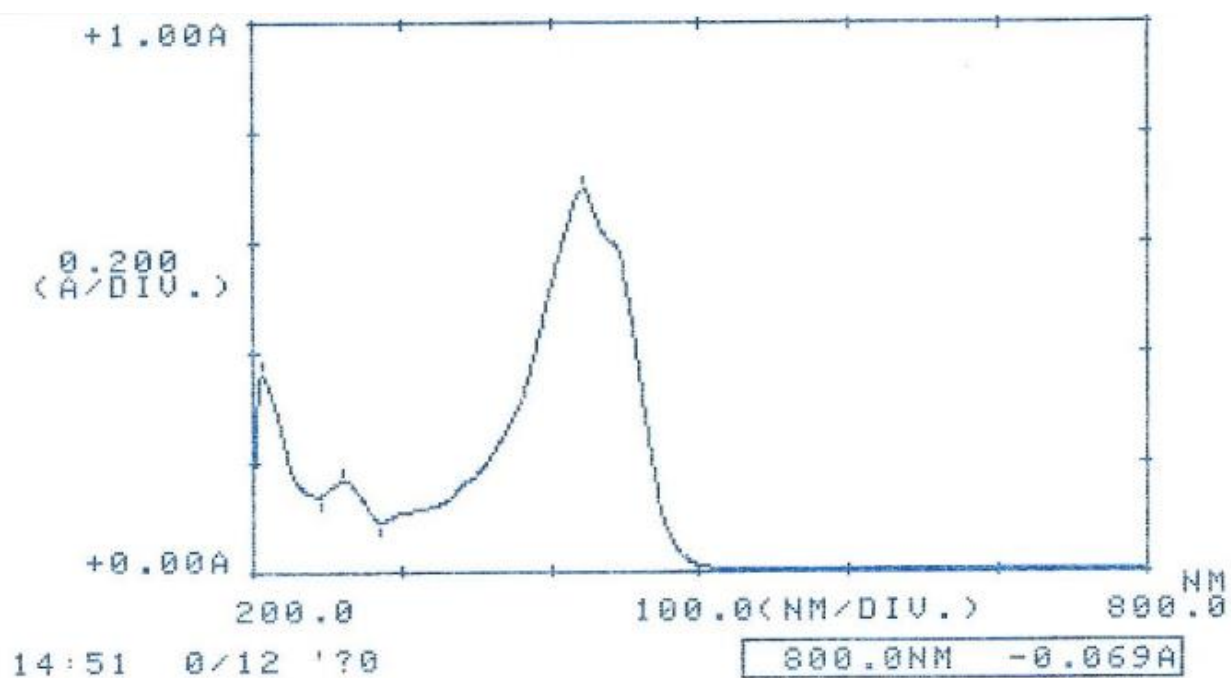

**Figure S8.** UV-Vis spectra of complex (1) dark brown solid (REF: Methanol).

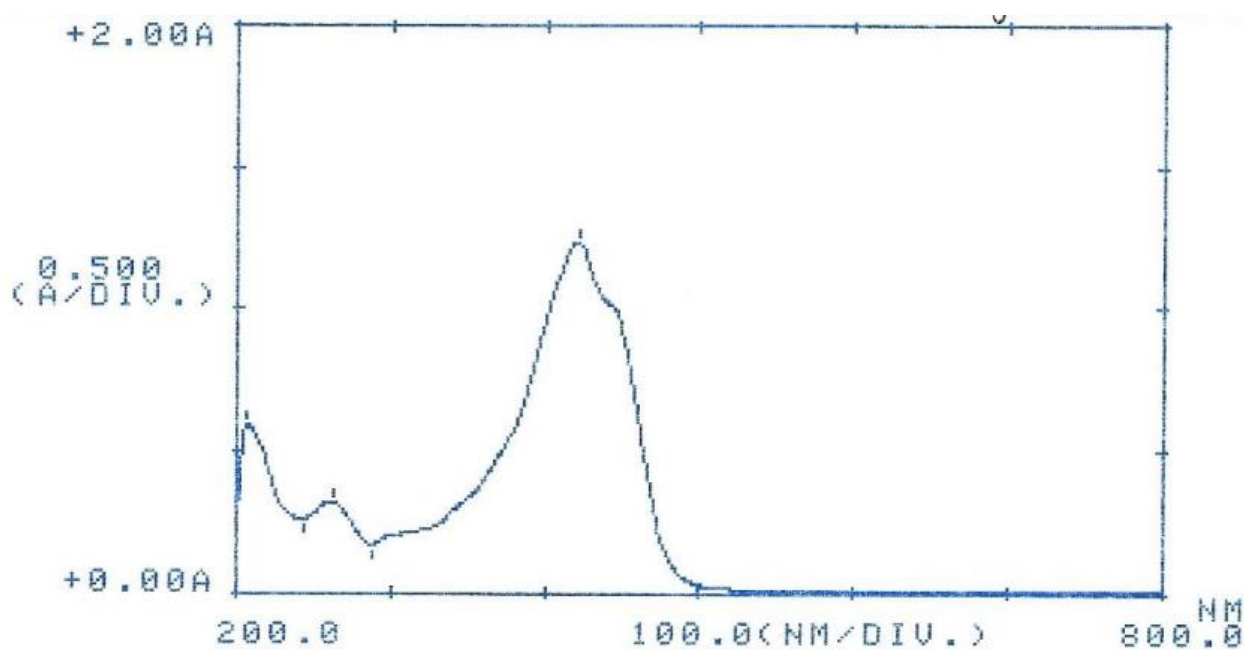

**Figure S9.** UV-Vis spectra of complex (1) brilliant brown crystalline solid (REF: Methanol).

## 6. Fingerprints plots

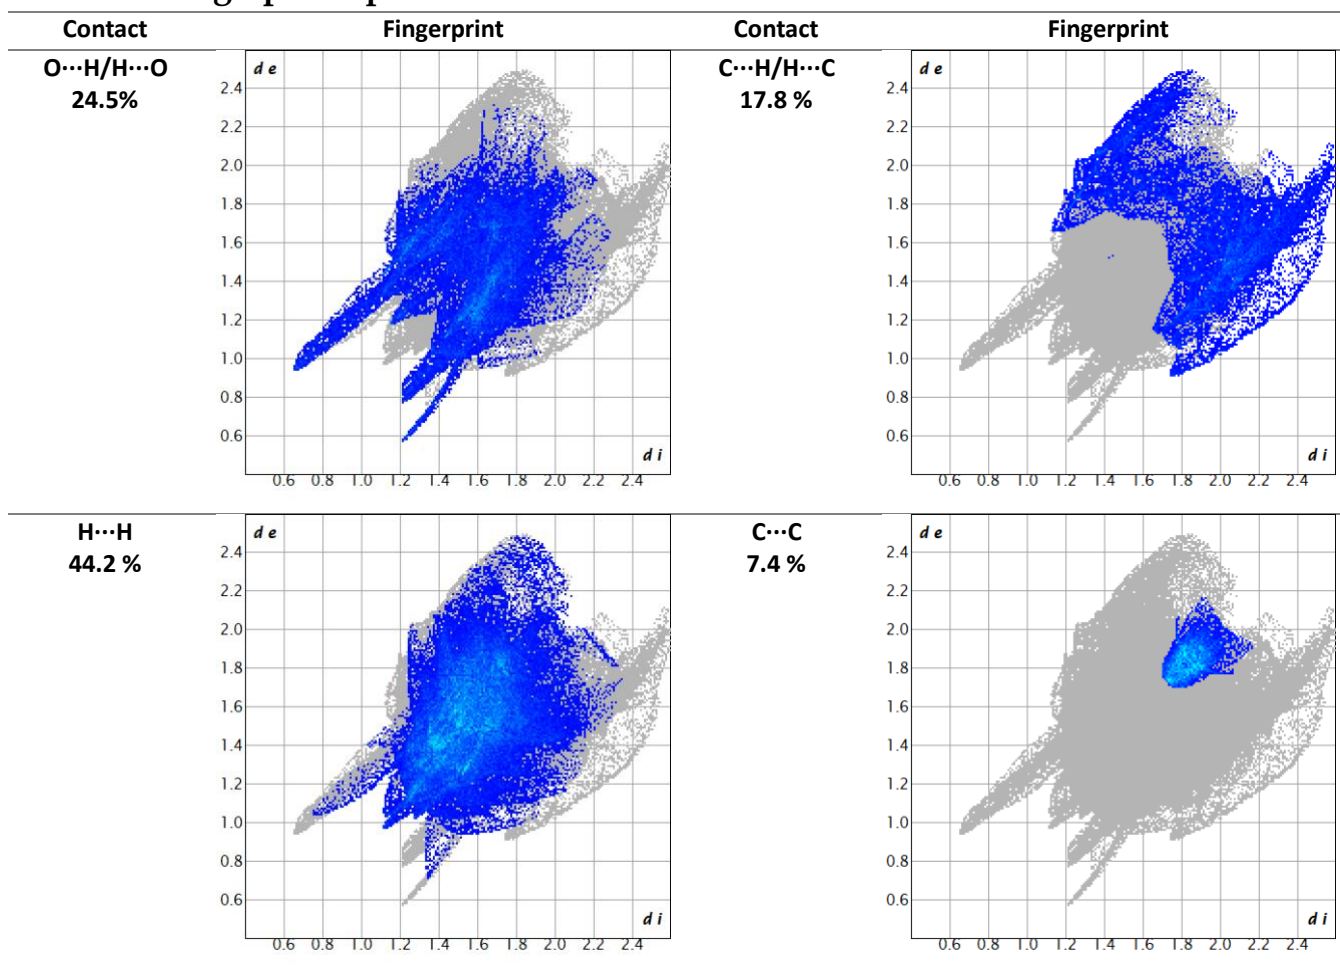

## 7. Cytotoxicity

**Table S1.** Growth inhibition percentages of cancerous and noncancerous (COS-7) cell lines by compounds (10  $\mu$ M, 48 h).

| Sample           | Grow inhibition (%) by cell line |      |       |        |       |        |       |
|------------------|----------------------------------|------|-------|--------|-------|--------|-------|
|                  | U251                             | PC-3 | K562  | HCT-15 | MCF-7 | SKLU-1 | COS-7 |
| <b>Curcumin</b>  | NC                               | 22.7 | 20.81 | 10.5   | 1.30  | 5.8    | 5.05  |
| <b>Complex 1</b> | 35.43                            | 29.3 | 62.87 | 18.8   | 0.55  | 26.1   | 20.35 |

Inhibition percentages of complex 1 relative to curcumin. Growth inhibition percentages of cancerous and noncancerous (COS-7) cell lines by compounds. U251 (human glioblastoma), PC-3 (human prostatic adenocarcinoma), K562 (human chronic myelogenous leukaemia), HCT-15 (human colorectal adenocarcinoma), MCF-7 (human mammary adenocarcinoma), cell lines were supplied by the National Cancer Institute (USA); and SKLU-1 (human lung adenocarcinoma) and COS-7 cell line (monkey African green kidney) were donated by the Cancer Institute of Mexico. \*The results are the average of three runs.

## 8. Antioxidant

**Table S2.** Inhibition of Lipid Peroxidation on Rat Brain

| Sample           | Concentration ( $\mu$ M) | TBARS (nmol/mg prot.) | Inhibition (%)     | IC <sub>50</sub> ( $\mu$ M) |
|------------------|--------------------------|-----------------------|--------------------|-----------------------------|
| <b>Complex 1</b> | Basal                    | 0.319 $\pm$ 0.051     |                    |                             |
|                  | Control                  | 9.038 $\pm$ 0.512     |                    |                             |
|                  | 0.18                     | 7.759 $\pm$ 0.548     | 14.27 $\pm$ 2.02   | 1.26 $\pm$ 0.08             |
|                  | 0.32                     | 7.242 $\pm$ 0.492*    | 19.98 $\pm$ 1.14*  |                             |
|                  | 0.56                     | 6.230 $\pm$ 0.488**   | 31.24 $\pm$ 1.80** |                             |
|                  | 1                        | 4.987 $\pm$ 0.315**   | 44.81 $\pm$ 1.88** |                             |
|                  | 1.78                     | 3.239 $\pm$ 0.342**   | 63.61 $\pm$ 5.30** |                             |
|                  | 3.16                     | 1.766 $\pm$ 0.525**   | 79.69 $\pm$ 6.78** |                             |
|                  | 5.62                     | 0.622 $\pm$ 0.053**   | 93.02 $\pm$ 0.91** |                             |
|                  | 10                       | 0.353 $\pm$ 0.072**   | 96.16 $\pm$ 0.58** |                             |

|                            |         |               |              |           |
|----------------------------|---------|---------------|--------------|-----------|
| <b>Curcumin</b>            | Basal   | 0.319±0.051   |              |           |
|                            | Control | 9.038±0.512   |              |           |
|                            | 0.18    | 8.345±0.412   | 7.58±1.12    | 3.03±0.15 |
|                            | 0.32    | 8.136±0.403   | 9.88±1.97    |           |
|                            | 0.56    | 7.542±0.462   | 16.6±0.39    |           |
|                            | 1       | 6.932±0.418** | 23.32±1.34** |           |
|                            | 1.78    | 6.100±0.322** | 32.48±0.39** |           |
|                            | 3.16    | 4.267±0.093** | 52.46±3.01** |           |
|                            | 5.62    | 2.289±0.343** | 74.11±5.04** |           |
|                            | 10      | 0.881±0.286** | 89.84±3.81** |           |
|                            |         |               |              |           |
| <b>BHT</b><br><b>(n=3)</b> | Basal   | 0.268±0.053   |              |           |
|                            | Control | 7.384±0.630   |              |           |
|                            | 0.56    | 6.098±0.353   | 16.64±2.86   | 1.22±0.44 |
|                            | 0.75    | 5.559±0.294*  | 23.92±2.69*  |           |
|                            | 1       | 4.457±0.283** | 37.14±7.44** |           |
|                            | 1.33    | 3.228±0.572** | 53.59±8.93** |           |
|                            | 1.78    | 1.315±0.489** | 81.59±6.89** |           |
|                            | 2.37    | 0.487±0.075** | 93.16±1.16** |           |

Homogenised in: PBS; Vehicle: DMSO; Experiment: Curve; Peroxidation: induced with FeSO<sub>4</sub> 10 µM, Incubation time: 1 h; EDTA: 2 µM.

The values represent the average of three independent experiments ± standard error of the media ( $\bar{x} \pm ES$ ). Data were subjected to an analysis of variance (ANOVA) followed by a Dunnett pass to isolate groups with significant differences. The values of  $p \leq 0.05$  (\*) and  $p \leq 0.01$  (\*\*) were considered as significant differences with respect to control.



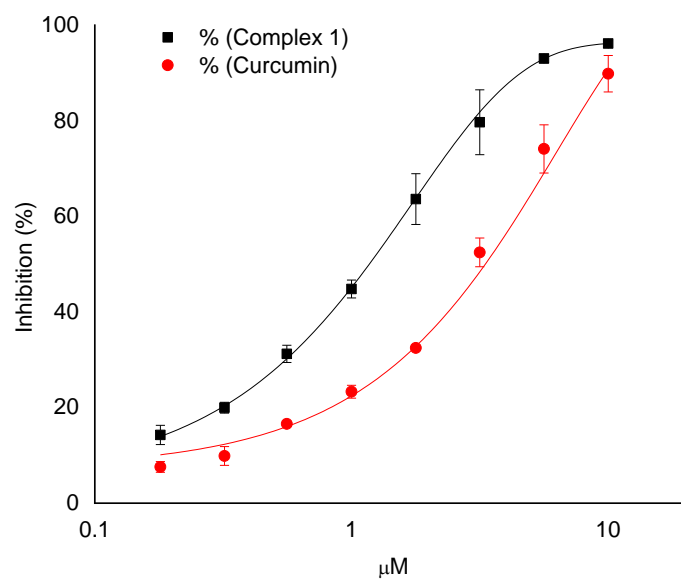

**Figure S9.** Inhibition curve
